# Supplementary material for: Cellulose hydrogenolysis to alcohol and ketone products using Co@C catalysts in the phosphoric acid aqueous solution
Source: Royal Society of Chemistry journal article supplement (doi:10.1039/d2re00273f), 2022-09-21
Supplement: d2re00273f1.pdf [file d2re00273f1.pdf]

## Cellulose Hydrogenolysis to Alcohol and Ketone Products Using

### Co@C Catalysts in Phosphoric Acid Aqueous Solution

Haosheng Xin<sup>a,b,c,d</sup>, Haiyong Wang<sup>a,b,c</sup>, Xiaohong Hu<sup>a,b,c</sup>, Xiuzheng Zhuang<sup>a,b,c</sup>, Long Yan<sup>a,b,c\*</sup>, Chenguang Wang<sup>a,b,c</sup>, Longlong Ma<sup>e</sup>, Qiying Liu<sup>a,b,c\*</sup>

<sup>a</sup>Guangzhou Institute of Energy Conversion, Chinese Academy of Sciences, Guangzhou 510640, P. R. China

<sup>b</sup>CAS Key Laboratory of Renewable Energy, Guangzhou 510640, P. R. China

<sup>c</sup>Guangdong Provincial Key Laboratory of New and Renewable Energy Research and Development, Guangzhou 510640, P. R. China

<sup>d</sup>University of Chinese Academy of Sciences, Beijing 100049, P. R. China

<sup>e</sup>Key Laboratory of Energy Thermal Conversion and Control of Ministry of Education, School of Energy and Environment, Southeast University, Nanjing 210096, China

**\*Corresponding author. Email:** liuqy@ms.giec.ac.cn.

Fax: +86-20-8705-7673; Tel: +86-20-3702-9839

Figure S1. The XRD spectrum of cellulose.

Figure S2. SEM images of cellulose.

Figure S3. H<sub>2</sub>-TPD profiles of Co@C catalyst samples.

Figure S4. NH<sub>3</sub>-TPD profiles of Co@C catalyst samples.

Figure S5. O1s XPS spectra of Co@C catalysts at different calcination temperature.

Figure S6. C1s XPS spectra of Co@C catalysts at different calcination temperature.

Figure S7. TEM images and statistical distribution of Co@C-700 particle size after 5 runs.

Figure S8. TG-MS analysis of Co@C-700 catalyst after 5 runs.

Table S1. Acid mount of Co@C catalysts determined by NH<sub>3</sub>-TPD.

Table S2. Reaction time to the gas phase distribution of Co@C-700 catalyst for cellulose hydrogenolysis.

Table S3. The CHN elemental analysis of Co@C catalysts.

Table S4. Ethanol conversion over Co@C-700 catalyst in H<sub>3</sub>PO<sub>4</sub>.

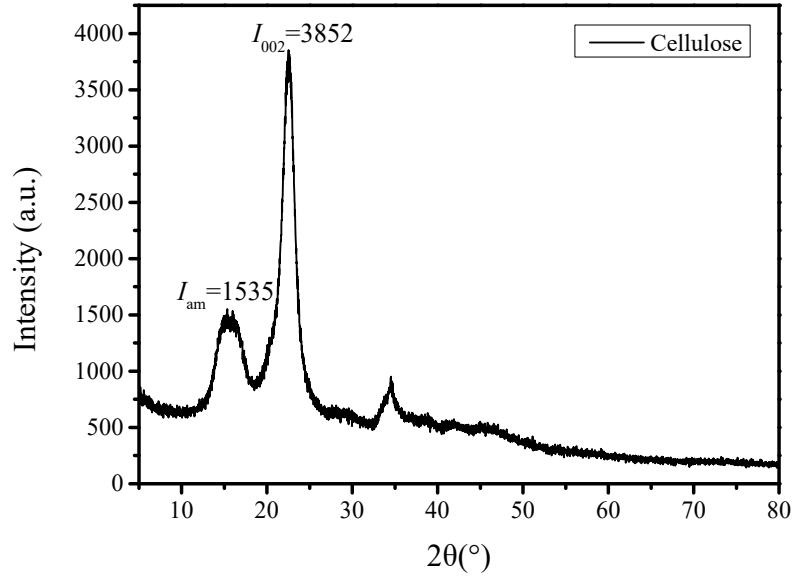

**Figure S1.** The XRD spectrum of cellulose

$$Cellulose_{crystallinity} = \frac{I_{002} - I_{am}}{I_{002}} \quad (S1)$$

Here,  $I_{002}$  is the diffraction intensity of 002 crystal face,  $I_{am}$  is the diffraction intensity of the amorphous part.

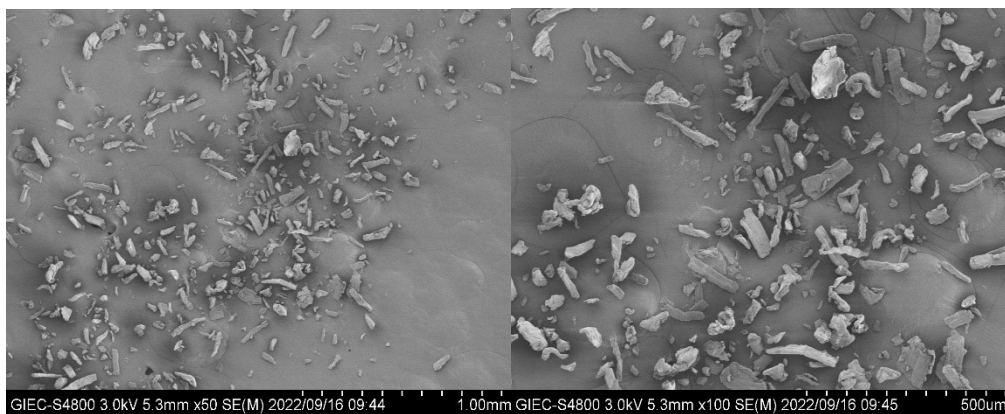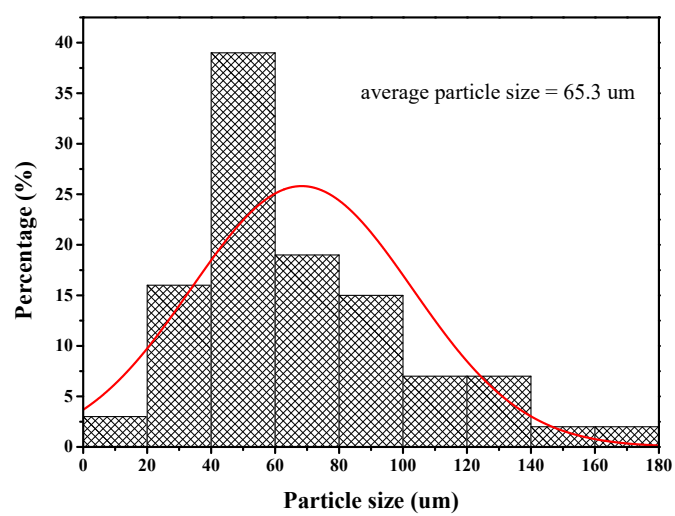

**Figure S2.** SEM images of cellulose

Here, we take the length of the cellulose particle as the benchmark and measure one hundred units to obtain the data in the Figure S2.

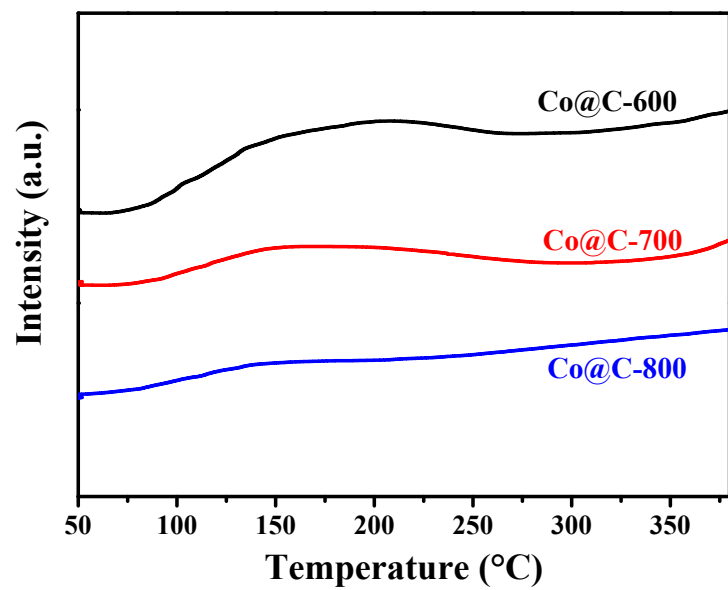

**Figure S3.** H<sub>2</sub>-TPD profiles of Co@C catalyst samples.

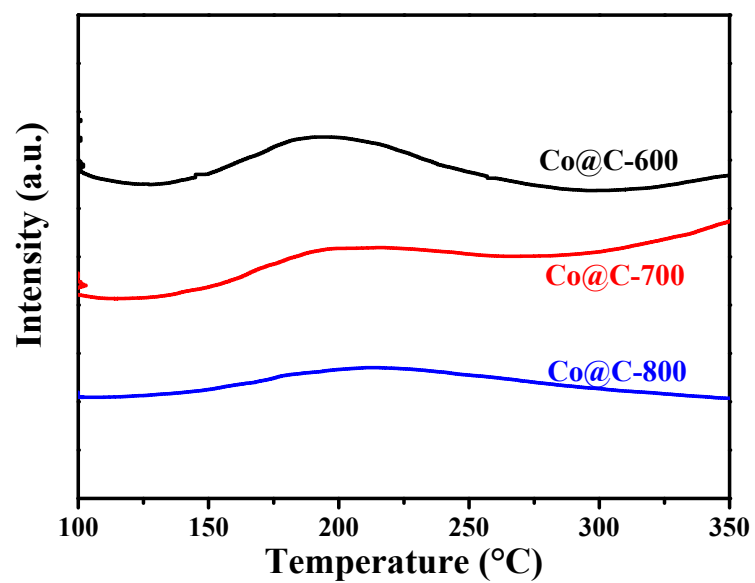

**Figure S4.** NH<sub>3</sub>-TPD profiles of Co@C catalyst samples.

**Table S1.** Acid mount of Co@C catalysts determined by NH<sub>3</sub>-TPD.

| Catalyst                | Co@C-600 | Co@C-700 | Co@C-800 |
|-------------------------|----------|----------|----------|
| Acid amount<br>(mmol/g) | 0.034    | 0.027    | 0.019    |

**Table S2.** Reaction time to the gas phase distribution of Co@C-700 catalyst for cellulose hydrogenolysis.

| Time (h) | Conversion (%) | Gas phase yield (C-mol%) | CH <sub>4</sub> | C <sub>2</sub> H <sub>6</sub> | C <sub>3</sub> H <sub>8</sub> | C <sub>4</sub> H <sub>10</sub> | n-C <sub>6</sub> H <sub>14</sub> | CO <sub>2</sub> |
|----------|----------------|--------------------------|-----------------|-------------------------------|-------------------------------|--------------------------------|----------------------------------|-----------------|
|          |                |                          | Selectivity     | Selectivity                   | Selectivity                   | Selectivity                    | Selectivity                      | Selectivity     |
|          |                |                          | y (%)           | y (%)                         | y (%)                         | y (%)                          | y (%)                            | y (%)           |
| 2        | 57             | 2.2                      | 53.5            | 0                             | 0                             | 0                              | 2.0                              | 44.5            |
| 2.5      | 99             | 4.4                      | 50.5            | 0                             | 0                             | 2.8                            | 7.0                              | 39.7            |
| 3        | 100            | 4.3                      | 56.5            | 0                             | 1.5                           | 2.0                            | 1.9                              | 38.1            |
| 3.5      | 100            | 6.3                      | 53.4            | 0                             | 0                             | 1.7                            | 3.3                              | 41.6            |
| 4        | 100            | 5.7                      | 53.1            | 1.5                           | 2.0                           | 2.2                            | 2.5                              | 38.7            |

Reaction conditions: 210 °C, 0.1 g cellulose, 50 mg Co@C-700, 5.5 MPa H<sub>2</sub>, 5 ml 0.06 M H<sub>3</sub>PO<sub>4</sub>, 800 rpm.

**Table S3.** The CHN elemental analysis of Co@C catalysts via two parallel tests.

| Catalyst | Run | C (%) | H (%) | N (%) |
|----------|-----|-------|-------|-------|
| Co@C-600 | 1   | 21.00 | 0.84  | 0.20  |
|          | 2   | 21.19 | 0.86  | 0.19  |
| Co@C-700 | 1   | 22.89 | 0.74  | 0.14  |
|          | 2   | 22.47 | 0.73  | 0.15  |
| Co@C-800 | 1   | 58.44 | 0.50  | 0.14  |
|          | 2   | 62.89 | 0.34  | 0.14  |

**Table S4.** Ethanol conversion over Co@C-700 catalyst in H<sub>3</sub>PO<sub>4</sub>

| Entry | Ethanol dosage (g) | Reaction time | Conversion | Gas phase         | Gas products    |                               |                 |
|-------|--------------------|---------------|------------|-------------------|-----------------|-------------------------------|-----------------|
|       |                    |               |            | yield<br>(C-mol%) | selectivity     |                               |                 |
|       |                    |               |            |                   | CH <sub>4</sub> | C <sub>2</sub> H <sub>6</sub> | CO <sub>2</sub> |
| 1     | 0.1007             | 0.5 h         | 3.2%       | 2.23              | 53.4            | 0.5                           | 46.1            |
| 2     | 0.1003             | 1.0 h         | 5.9%       | 3.74              | 51.4            | 3.2                           | 45.4            |

Reaction conditions: 210°C, 50 mg Co@C-700, 5.5 MPa H<sub>2</sub>, 5 ml 0.06 M H<sub>3</sub>PO<sub>4</sub>, 800 rpm.

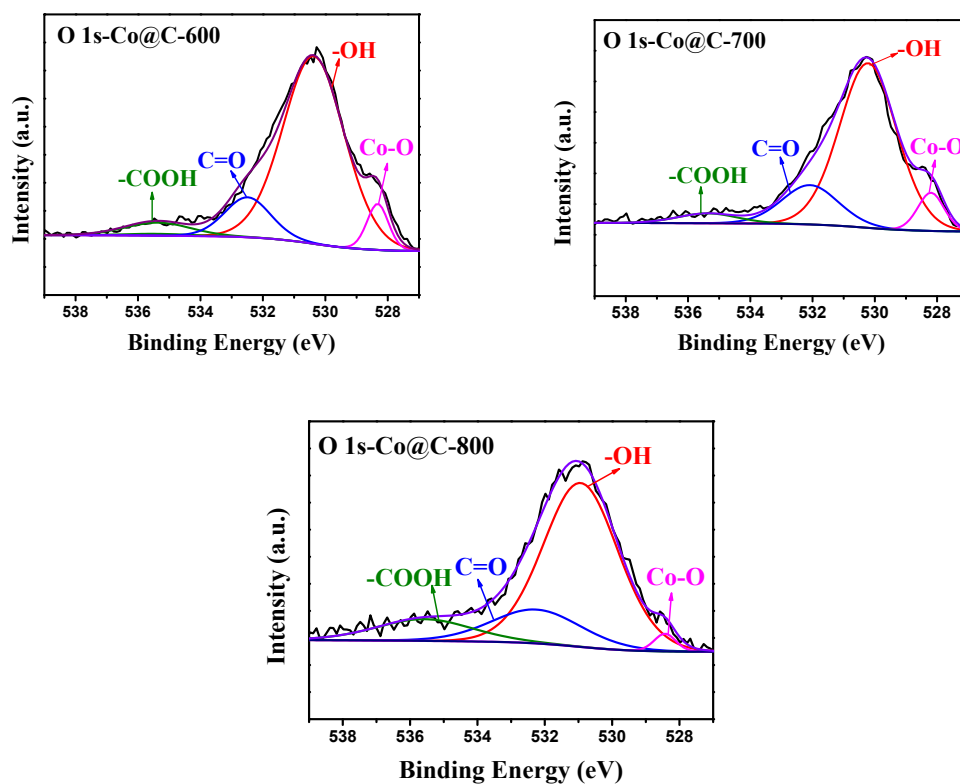

Figure S5. O<sub>1s</sub> XPS spectra of Co@C catalysts at different calcination temperature

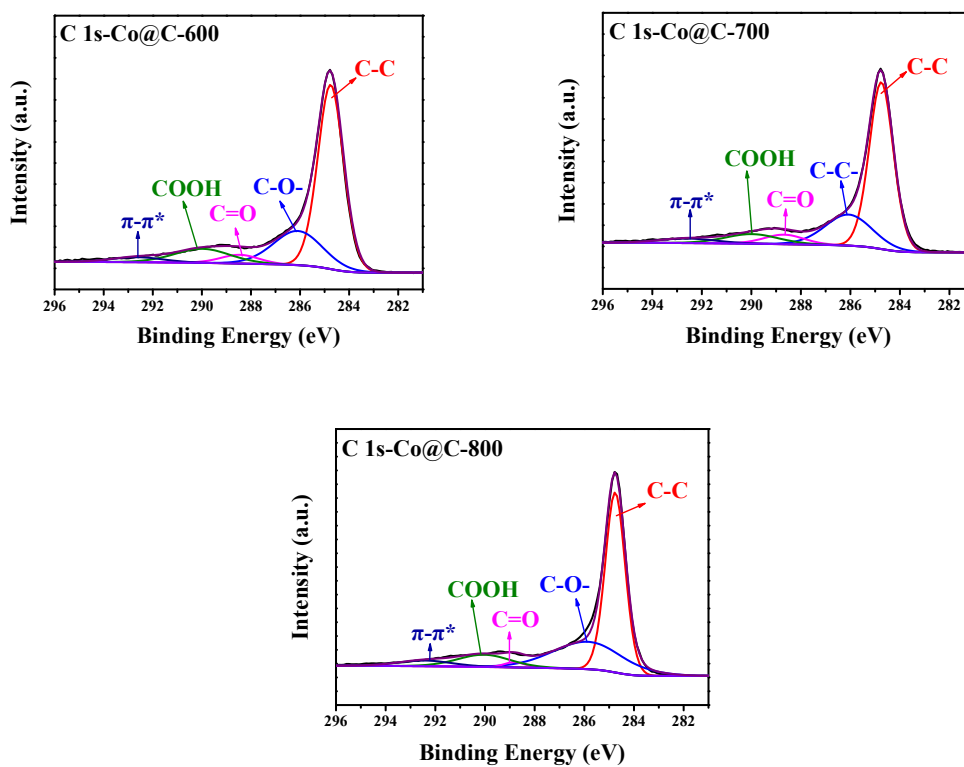

Figure S6. C<sub>1s</sub> XPS spectra of Co@C catalysts at different calcination temperature

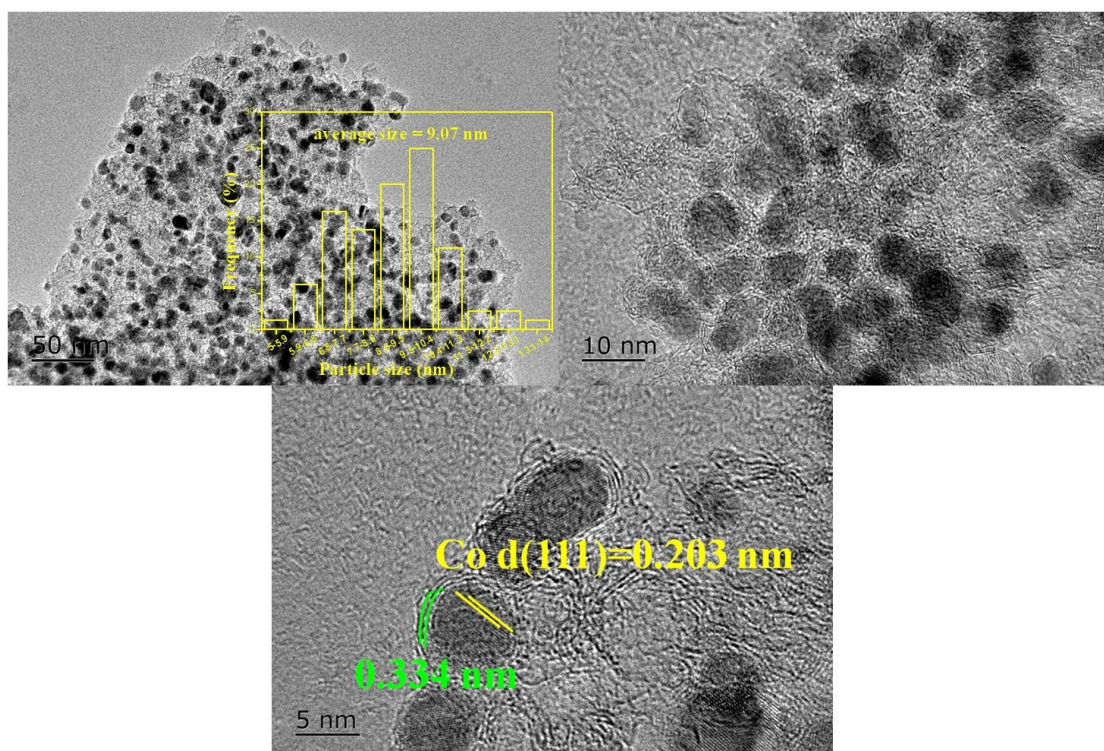

**Figure S7.** TEM images and statistical distribution of Co@C-700 particle size after 5 runs

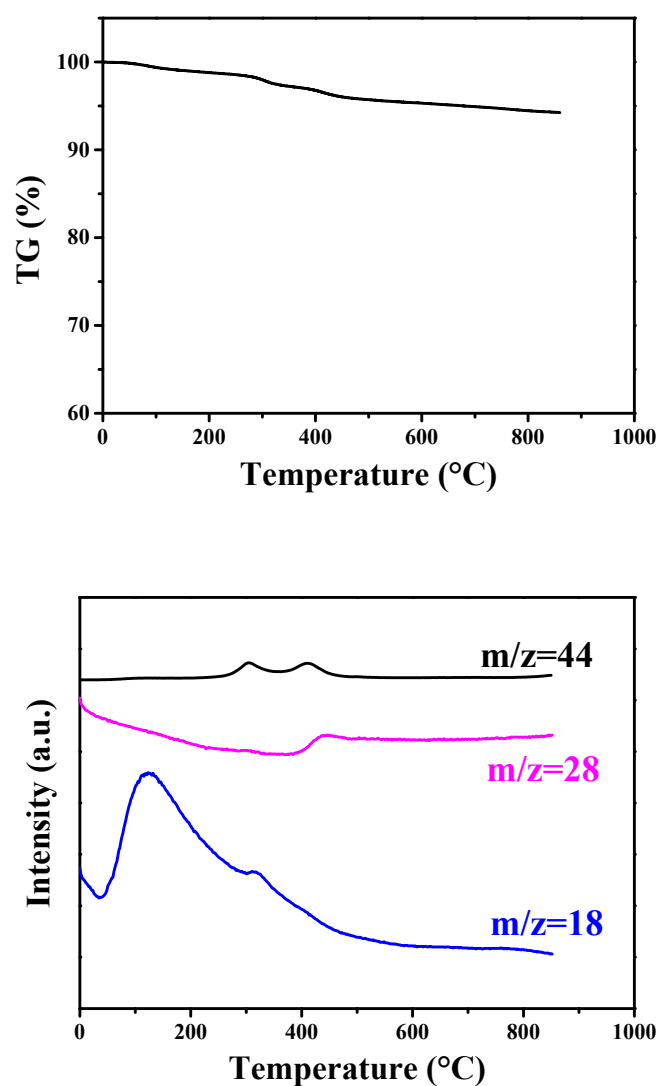

**Figure S8.** TG-MS analysis of Co@C-700 catalyst.

The experiment was conducted at the heating rate of 10 °C/min under 100 ml/min N<sub>2</sub> flow. The outlet gases from the decomposition was monitored by H<sub>2</sub>O (m/z=18), CO (m/z=28), CO<sub>2</sub> (m/z=44). Two main weight losses of about 2.5% and 3.5% were observed in the range of 50 °C - 250 °C and 300 °C - 600 °C during the decomposition, respectively. Based on the MS measurements, the weight losses (below 210 °C) were mainly ascribed to the H<sub>2</sub>O desorption of Co@C-700 catalyst
